# Supplementary material for: Efficacy of Hot Tea Infusion vs. Ethanolic Extract of Moringa oleifera for the Simultaneous Treatment of Nonalcoholic Fatty Liver, Hyperlipidemia, and Hyperglycemia in a Murine Model Fed with a High-Fat Diet
Source: J Nutr Metab. 2024 Feb 12;2024:2209581. doi: 10.1155/2024/2209581 (PMC10876314; doi:10.1155/2024/2209581)
Supplement: Supplementary Materials — S1 Table: comparisons of chemical shifts of the MO extract and infusion vs. some of the principal metabolites isolated from the leaves of Moringa oleifera in CDCl3. SII Table: food intake and weight of the experimental groups. SIII Table: glucose tolerance curve according to the groups studied. S1 Figure: 1H NMR spectra for the infusion leaves of Moringa oleifera, 1H-NMR in CDCl3 (400 MHz). S2 Figure: 1H NMR spectra for the ethanolic extract from the leaves of Moringa oleifera, 1H-NMR in CDCl3 (400 MHz). S3 Figure: 13C NMR spectra for the infusion leaves of Moringa oleifera, 13C-NMR in CDCl3 (100 MHz). S4 Figure: 13C NMR spectra for the ethanolic extract from the leaves of Moringa oleifera, 13C-NMR in CDCl3 (100 MHz). [file 2209581.f1.zip]

Archive with 2 entries (2 files):
- 2209581.f1.docx
- Author Checklist - E10 only (1).pdf
